# Supplementary material for: Suicides in Germany: results from the official cause of death statistics
Source: Bundesgesundheitsblatt Gesundheitsforschung Gesundheitsschutz. 2021 Dec 28;65(1):3–10. [Article in German] doi: 10.1007/s00103-021-03470-2 (PMC8732928; doi:10.1007/s00103-021-03470-2)
Supplement: Supplementary file 1 [file 103_2021_3470_MOESM1_ESM.pdf]

Onlinematerial zum Beitrag:

## **Suizide in Deutschland: Ergebnisse der amtlichen Todesursachenstatistik**

Torsten Schelhase<sup>1</sup>

<sup>1</sup> Statistisches Bundesamt, Zweigstelle Bonn, H11 Gesundheitsstatistiken, Bonn, Deutschland

### **Korrespondenzadresse:**

Torsten Schelhase

Statistisches Bundesamt, Zweigstelle Bonn

Referatsleiter H11 Gesundheitsstatistiken

Graurheindorfer Straße 198

53117 Bonn

torsten.schelhase@destatis.de

### **Inhalt:**

**Abbildung Z1:** Internationales Formular der Todesursachenbescheinigung der Weltgesundheitsorganisation (WHO)

**Tabelle Z1:** Methoden des Suizids absolut und Anteil an allen Suiziden nach Geschlecht in Deutschland, 2019

**Abbildung Z1:** Internationales Formular der Todesursachenbescheinigung der Weltgesundheitsorganisation (WHO)

| Angaben zur Person (hier sind weitere Angaben je nach Erfordernis des Landes möglich)                                                                                                                                                            |  |                                                                   |        |                                                               |   |                                   |   |                                                        |   |                                                             |  |                                        |   |                                        |   |   |   |   |   |
|--------------------------------------------------------------------------------------------------------------------------------------------------------------------------------------------------------------------------------------------------|--|-------------------------------------------------------------------|--------|---------------------------------------------------------------|---|-----------------------------------|---|--------------------------------------------------------|---|-------------------------------------------------------------|--|----------------------------------------|---|----------------------------------------|---|---|---|---|---|
| Geschlecht                                                                                                                                                                                                                                       |  | <input type="checkbox"/> Weiblich                                 |        |                                                               |   | <input type="checkbox"/> Männlich |   |                                                        |   | <input type="checkbox"/> Nicht bekannt                      |  |                                        |   |                                        |   |   |   |   |   |
| Geburtsdatum                                                                                                                                                                                                                                     |  | T                                                                 | T      | M                                                             | M | J                                 | J | J                                                      | J | Sterbedatum                                                 |  | T                                      | T | M                                      | M | J | J | J | J |
| Abschnitt 1 - Medizinische Angaben: Teil 1 und 2                                                                                                                                                                                                 |  |                                                                   |        |                                                               |   |                                   |   |                                                        |   |                                                             |  |                                        |   |                                        |   |   |   |   |   |
| 1. Direkt zum Tode führende Krankheit oder Zustand in Zeile a eintragen<br><br>Krankheiten oder Zustände als Kausalkette eintragen (wenn zutreffend)<br><br>Zugrunde liegende Krankheit oder Zustand auf der untersten benutzten Zeile eintragen |  | Todesursache                                                      |        |                                                               |   |                                   |   |                                                        |   |                                                             |  |                                        |   | Zeitintervall vom Beginn bis zum Tod   |   |   |   |   |   |
|                                                                                                                                                                                                                                                  |  | a                                                                 |        |                                                               |   |                                   |   |                                                        |   |                                                             |  |                                        |   |                                        |   |   |   |   |   |
|                                                                                                                                                                                                                                                  |  | b                                                                 | Durch: |                                                               |   |                                   |   |                                                        |   |                                                             |  |                                        |   |                                        |   |   |   |   |   |
|                                                                                                                                                                                                                                                  |  | c                                                                 | Durch: |                                                               |   |                                   |   |                                                        |   |                                                             |  |                                        |   |                                        |   |   |   |   |   |
|                                                                                                                                                                                                                                                  |  | d                                                                 | Durch: |                                                               |   |                                   |   |                                                        |   |                                                             |  |                                        |   |                                        |   |   |   |   |   |
| 2. Weitere wesentliche Krankheiten oder Zustände, die zum Tode beigetragen haben (Zeitintervall kann in Klammern hinter den Zustand geschrieben werden)                                                                                          |  |                                                                   |        |                                                               |   |                                   |   |                                                        |   |                                                             |  |                                        |   |                                        |   |   |   |   |   |
| Abschnitt 2 - Weitere medizinische Angaben                                                                                                                                                                                                       |  |                                                                   |        |                                                               |   |                                   |   |                                                        |   |                                                             |  |                                        |   |                                        |   |   |   |   |   |
| Wurde innerhalb der letzten 4 Wochen eine Operation durchgeführt?                                                                                                                                                                                |  |                                                                   |        |                                                               |   |                                   |   |                                                        |   | <input type="checkbox"/> Ja                                 |  | <input type="checkbox"/> Nein          |   | <input type="checkbox"/> Nicht bekannt |   |   |   |   |   |
| Falls Ja, geben Sie das Datum der Operation an                                                                                                                                                                                                   |  |                                                                   |        |                                                               |   |                                   |   |                                                        |   | T T M M J J J J                                             |  |                                        |   |                                        |   |   |   |   |   |
| Falls Ja, geben Sie den Grund für die Operation an (Krankheit oder Zustand)                                                                                                                                                                      |  |                                                                   |        |                                                               |   |                                   |   |                                                        |   |                                                             |  |                                        |   |                                        |   |   |   |   |   |
| Wurde eine Autopsie beantragt?                                                                                                                                                                                                                   |  |                                                                   |        |                                                               |   |                                   |   |                                                        |   | <input type="checkbox"/> Ja                                 |  | <input type="checkbox"/> Nein          |   | <input type="checkbox"/> Nicht bekannt |   |   |   |   |   |
| Wenn Ja, wurden die Ergebnisse in diesem Schein bereits berücksichtigt?                                                                                                                                                                          |  |                                                                   |        |                                                               |   |                                   |   |                                                        |   | <input type="checkbox"/> Ja                                 |  | <input type="checkbox"/> Nein          |   | <input type="checkbox"/> Nicht bekannt |   |   |   |   |   |
| Todesart                                                                                                                                                                                                                                         |  |                                                                   |        |                                                               |   |                                   |   |                                                        |   |                                                             |  |                                        |   |                                        |   |   |   |   |   |
| <input type="checkbox"/> Krankheit                                                                                                                                                                                                               |  |                                                                   |        | <input type="checkbox"/> Tötlicher Angriff                    |   |                                   |   | <input type="checkbox"/> Konnte nicht ermittelt werden |   |                                                             |  |                                        |   |                                        |   |   |   |   |   |
| <input type="checkbox"/> Unfall                                                                                                                                                                                                                  |  |                                                                   |        | <input type="checkbox"/> Gesetzliche Maßnahme                 |   |                                   |   | <input type="checkbox"/> Offene Ermittlung             |   |                                                             |  |                                        |   |                                        |   |   |   |   |   |
| <input type="checkbox"/> Suizid                                                                                                                                                                                                                  |  |                                                                   |        | <input type="checkbox"/> Krieg                                |   |                                   |   | <input type="checkbox"/> Unbekannt                     |   |                                                             |  |                                        |   |                                        |   |   |   |   |   |
| Falls eine äußere Ursache oder Vergiftung vorliegt:                                                                                                                                                                                              |  |                                                                   |        | Datum der äußeren Ursache oder Vergiftung                     |   |                                   |   | T T M M J J J J                                        |   |                                                             |  |                                        |   |                                        |   |   |   |   |   |
| Beschreiben Sie, wie es zur äußeren Ursache kam (bei Vergiftung die Substanz angeben)                                                                                                                                                            |  |                                                                   |        |                                                               |   |                                   |   |                                                        |   |                                                             |  |                                        |   |                                        |   |   |   |   |   |
| Ort des Ereignis der äußeren Ursache (wenn zutreffend)                                                                                                                                                                                           |  |                                                                   |        |                                                               |   |                                   |   |                                                        |   |                                                             |  |                                        |   |                                        |   |   |   |   |   |
| <input type="checkbox"/> Zuhause                                                                                                                                                                                                                 |  | <input type="checkbox"/> Wohnheim oder -anstalt                   |        | <input type="checkbox"/> Schule, sonstige öffentliche Gebäude |   |                                   |   | <input type="checkbox"/> Sportstätte                   |   |                                                             |  |                                        |   |                                        |   |   |   |   |   |
| <input type="checkbox"/> Straße oder Weg                                                                                                                                                                                                         |  | <input type="checkbox"/> Gewerbe- oder Dienstleistungseinrichtung |        | <input type="checkbox"/> Industrieanlage oder Baustelle       |   |                                   |   | <input type="checkbox"/> Landwirtschaftlicher Betrieb  |   |                                                             |  |                                        |   |                                        |   |   |   |   |   |
| <input type="checkbox"/> Sonstiger näher bezeichneter Ort:                                                                                                                                                                                       |  |                                                                   |        |                                                               |   |                                   |   |                                                        |   |                                                             |  | <input type="checkbox"/> Nicht bekannt |   |                                        |   |   |   |   |   |
| Fetal- oder Säuglingssterbefall (wenn zutreffend)                                                                                                                                                                                                |  |                                                                   |        |                                                               |   |                                   |   |                                                        |   |                                                             |  |                                        |   |                                        |   |   |   |   |   |
| Mehringsschwangerschaft                                                                                                                                                                                                                          |  |                                                                   |        |                                                               |   |                                   |   |                                                        |   | <input type="checkbox"/> Ja                                 |  | <input type="checkbox"/> Nein          |   | <input type="checkbox"/> Nicht bekannt |   |   |   |   |   |
| Totgeburt                                                                                                                                                                                                                                        |  |                                                                   |        |                                                               |   |                                   |   |                                                        |   | <input type="checkbox"/> Ja                                 |  | <input type="checkbox"/> Nein          |   | <input type="checkbox"/> Nicht bekannt |   |   |   |   |   |
| Bei Tod innerhalb von 24 Stunden: gelebte Stunden                                                                                                                                                                                                |  |                                                                   |        |                                                               |   |                                   |   | Geburtsgewicht (in Gramm)                              |   |                                                             |  |                                        |   |                                        |   |   |   |   |   |
| Vollendete Wochen der Schwangerschaft                                                                                                                                                                                                            |  |                                                                   |        |                                                               |   |                                   |   | Alter der Mutter (in Jahren)                           |   |                                                             |  |                                        |   |                                        |   |   |   |   |   |
| Falls es sich um einen Perinatalsterbefall handelt, dokumentieren Sie die Krankheiten der Mutter, die Auswirkungen auf den Fetus und das Neugeborene hatten                                                                                      |  |                                                                   |        |                                                               |   |                                   |   |                                                        |   |                                                             |  |                                        |   |                                        |   |   |   |   |   |
| Lag eine Schwangerschaft vor?                                                                                                                                                                                                                    |  |                                                                   |        |                                                               |   |                                   |   |                                                        |   | <input type="checkbox"/> Ja                                 |  | <input type="checkbox"/> Nein          |   | <input type="checkbox"/> Nicht bekannt |   |   |   |   |   |
| <input type="checkbox"/> Zum Zeitpunkt des Todes                                                                                                                                                                                                 |  |                                                                   |        |                                                               |   |                                   |   |                                                        |   | <input type="checkbox"/> Innerhalb von 42 Tagen vor dem Tod |  |                                        |   |                                        |   |   |   |   |   |
| <input type="checkbox"/> Zwischen 43 Tage und bis zu einem Jahr vor dem Tod                                                                                                                                                                      |  |                                                                   |        |                                                               |   |                                   |   |                                                        |   | <input type="checkbox"/> Nicht bekannt                      |  |                                        |   |                                        |   |   |   |   |   |
| Hat die Schwangerschaft zum Tode beigetragen?                                                                                                                                                                                                    |  |                                                                   |        |                                                               |   |                                   |   |                                                        |   | <input type="checkbox"/> Ja                                 |  | <input type="checkbox"/> Nein          |   | <input type="checkbox"/> Nicht bekannt |   |   |   |   |   |

**Tabelle Z1:** Methoden des Suizids absolut und Anteil an allen Suiziden nach Geschlecht in Deutschland, 2019

| Methoden<br>mit ICD-10-Code                                                                                                                                                       | Anzahl absolut |        |        | Anteil an allen<br>Suiziden |        |        |
|-----------------------------------------------------------------------------------------------------------------------------------------------------------------------------------|----------------|--------|--------|-----------------------------|--------|--------|
|                                                                                                                                                                                   | Insgesamt      | Männer | Frauen | Insgesamt                   | Männer | Frauen |
| X60 Vorsätzliche Selbstvergiftung durch und Exposition gegenüber nicht opioidhaltige(n) Analgetika, Antipyretika und Antirheumatika                                               | 8              | 3      | 5      | 0,1%                        | 0,0%   | 0,2%   |
| X61 Vorsätzliche Selbstvergiftung durch und Exposition gegenüber Antiepileptika, Hypnotika, Antiparkinsonmittel(n) und psychotrope(n) Substanzen, anderenorts nicht klassifiziert | 217            | 99     | 118    | 2,4%                        | 1,4%   | 5,4%   |
| X62 Vorsätzliche Selbstvergiftung durch und Exposition gegenüber Betäubungsmittel und Psychodysleptika [Halluzinogene], anderenorts nicht klassifiziert                           | 105            | 55     | 50     | 1,2%                        | 0,8%   | 2,3%   |
| X63 Vorsätzliche Selbstvergiftung durch und Exposition gegenüber sonstige(n) Arzneimittel(n) mit Wirkung auf das autonome Nervensystem                                            | 17             | 9      | 8      | 0,2%                        | 0,1%   | 0,4%   |
| X64 Vorsätzliche Selbstvergiftung durch und Exposition gegenüber sonstige(n) und nicht näher bezeichnete(n) Arzneimittel(n), Drogen und biologisch aktive(n) Substanzen           | 621            | 324    | 297    | 6,9%                        | 4,7%   | 13,5%  |
| X65 Vorsätzliche Selbstvergiftung durch und Exposition gegenüber Alkohol                                                                                                          | 22             | 14     | 8      | 0,2%                        | 0,2%   | 0,4%   |
| X66 Vorsätzliche Selbstvergiftung durch und Exposition gegenüber organische(n) Lösungsmittel(n) oder halogenierte(n) Kohlenwasserstoffe(n) und deren Dämpfe(n)                    | 3              | 1      | 2      | 0,0%                        | 0,0%   | 0,1%   |

|                                                                                                                                                       |       |       |     |       |       |       |
|-------------------------------------------------------------------------------------------------------------------------------------------------------|-------|-------|-----|-------|-------|-------|
| X67 Vorsätzliche Selbstvergiftung durch und Exposition gegenüber sonstige(n) Gase(n) und Dämpfe(n)                                                    | 387   | 326   | 61  | 4,3%  | 4,8%  | 2,8%  |
| X68 Vorsätzliche Selbstvergiftung durch und Exposition gegenüber Schädlingsbekämpfungsmittel(n) [Pestizide(n)]                                        | 21    | 14    | 7   | 0,2%  | 0,2%  | 0,3%  |
| X69 Vorsätzliche Selbstvergiftung durch und Exposition gegenüber sonstige(n) oder nicht näher bezeichnete(n) Chemikalien und schädliche(n) Substanzen | 149   | 91    | 58  | 1,6%  | 1,3%  | 2,6%  |
| X70 Vorsätzliche Selbstbeschädigung durch Erhängen, Strangulierung oder Erstickern                                                                    | 4.074 | 3.358 | 716 | 45,1% | 49,1% | 32,6% |
| X71 Vorsätzliche Selbstbeschädigung durch Ertrinken und Untergehen                                                                                    | 200   | 115   | 85  | 2,2%  | 1,7%  | 3,9%  |
| X72 Vorsätzliche Selbstbeschädigung durch Handfeuerwaffe                                                                                              | 108   | 106   | 2   | 1,2%  | 1,5%  | 0,1%  |
| X73 Vorsätzliche Selbstbeschädigung durch Gewehr, Schrotflinte oder schwerere Feuerwaffe [Schusswaffe]                                                | 42    | 42    | 0   | 0,5%  | 0,6%  | 0,0%  |
| X74 Vorsätzliche Selbstbeschädigung durch sonstige oder nicht näher bezeichnete Feuerwaffe [Schusswaffe]                                              | 516   | 497   | 19  | 5,7%  | 7,3%  | 0,9%  |
| X75 Vorsätzliche Selbstbeschädigung durch Explosivstoffe                                                                                              | 5     | 4     | 1   | 0,1%  | 0,1%  | 0,0%  |
| X76 Vorsätzliche Selbstbeschädigung durch Rauch, Feuer und Flammen                                                                                    | 66    | 44    | 22  | 0,7%  | 0,6%  | 1,0%  |
| X77 Vorsätzliche Selbstbeschädigung durch Wasserdampf, heiße Dämpfe oder heiße Gegenstände                                                            | 1     | 1     | 0   | 0,0%  | 0,0%  | 0,0%  |
| X78 Vorsätzliche Selbstbeschädigung durch scharfen Gegenstand                                                                                         | 400   | 314   | 86  | 4,4%  | 4,6%  | 3,9%  |

|                                                                                                             |     |     |     |       |      |       |
|-------------------------------------------------------------------------------------------------------------|-----|-----|-----|-------|------|-------|
| X79 Vorsätzliche<br>Selbstbeschädigung durch<br>stumpfen Gegenstand                                         | 1   | 1   | 0   | 0,0%  | 0,0% | 0,0%  |
| X80 Vorsätzliche<br>Selbstbeschädigung durch Sturz<br>in die Tiefe                                          | 917 | 594 | 323 | 10,1% | 8,7% | 14,7% |
| X81 Vorsätzliche<br>Selbstbeschädigung durch<br>Sichwerfen oder Sichlegen vor<br>ein sich bewegendes Objekt | 483 | 351 | 132 | 5,3%  | 5,1% | 6,0%  |
| X82 Vorsätzliche<br>Selbstbeschädigung durch<br>absichtlich verursachten<br>Kraftfahrzeugunfall             | 81  | 62  | 19  | 0,9%  | 0,9% | 0,9%  |
| X83 Vorsätzliche<br>Selbstbeschädigung auf sonstige<br>näher bezeichnete Art und<br>Weise                   | 106 | 72  | 34  | 1,2%  | 1,1% | 1,5%  |
| X84 Vorsätzliche<br>Selbstbeschädigung auf nicht<br>näher bezeichnete Art und<br>Weise                      | 491 | 345 | 146 | 5,4%  | 5,0% | 6,6%  |

Quelle: Statistisches Bundesamt, Todesursachenstatistik, 2021
